# Supplementary material
Source: publisher figshare collection journal article supplement (https://tandf.figshare.com/articles/dataset/_/8327039)
Supplement: Supplementary file 1 [file 2]

# Statistical Analysis of Functions on Surfaces, with an application to Medical Imaging

April 27, 2018

The full data and code for the analysis (approx 4Gb) is available from the link

[https://drive.google.com/open?id=1WriRwF10TW\\_tTHb9Ek22UolEviEY5iq\\_](https://drive.google.com/open?id=1WriRwF10TW_tTHb9Ek22UolEviEY5iq_)
